# Supplementary material for: Mitochondrial Ca2+ flux modulates spontaneous electrical activity in ventricular cardiomyocytes
Source: PubMed Central journal article supplement (PMC6042741; doi:10.1371/journal.pone.0200448), 2018-07-12

## MATERIALS AND METHODS

### Intracellular $Mg^{2+}$ measurement

Free intracellular  $Mg^{2+}$  concentration ( $[Mg^{2+}]_i$ ) was labeled by Mag-Fluo-4 AM (ThermoFisher Scientific). The hiPSC-derived CMs in Tyrode solution were loaded with 10  $\mu$ M Mag-Fluo-4 AM for 40 minutes at 37°C followed by 2 washes and 30min de-esterification[1]. Mag-Fluo-4 was excited at 488nm and emitted fluorescence was collected at wavelengths of 510-560 nm. Two dimensional images (2048  $\times$  2048 pixels) were acquired by a real-time fluorescence microscope (Olympus IX81, Japan) at 30 s intervals. Analysis of the signals was performed with the software MetaMorph (version 7.8.11.0, Nashville, TN). The change of  $[Mg^{2+}]_i$  were presented as background-subtracted normalized fluorescence ( $F/F_0$ ).

## RESULTS

### The effect of FCCP on $[Mg^{2+}]_i$ in hiPSC-derived ventricular-like CMs

Almost all the intracellular  $Mg^{2+}$  is bound to ATP, and only a small fraction is free. Since free  $[Mg^{2+}]_i$  is kept constant within a very narrow range, any change in cellular ATP levels leads to a concomitant change in free  $[Mg^{2+}]_i$ . Thus, changes in  $[Mg^{2+}]_i$  can be interpreted as reciprocal changes of  $[ATP]_i$ [2]. FCCP caused a rapid depletion of the cellular bulk ATP pool which can be reflected by an increased  $[Mg^{2+}]_i$ . Nevertheless, this phenomenon was not observed if oligomycin (1  $\mu$ mol/L) was applied (Fig S1). This indirectly indicated that the  $[ATP]_i$  level was not altered significantly during the combination of FCCP and oligomycin treatment.

## REFERENCES

1. Kawahara K, Sato R, Iwabuchi S, Matsuyama D. Rhythmic fluctuations in the concentration of intracellular  $Mg^{2+}$  in association with spontaneous rhythmic contraction in cultured cardiac myocytes. *Chronobiol Int.* 2008;25: 868-81.
2. Zima AV, Pabbidi MR, Lipsius SL, Blatter LA. Effects of mitochondrial uncoupling on  $Ca^{2+}$  signaling during excitation-contraction coupling in atrial myocytes. *Am J Physiol Heart Circ Physiol.* 2013;304: H983-93.

## FIGURE LEGEND

**Fig S1.** The average effect of FCCP ( $\pm$  oligomycin) on  $[Mg^{2+}]_i$  in hiPSC-derived ventricular-like CMs (n=10 for each group).

**Fig. S1 Intracellular free ATP level is not altered significantly during the combination of FCCP and oligomycin treatment.**

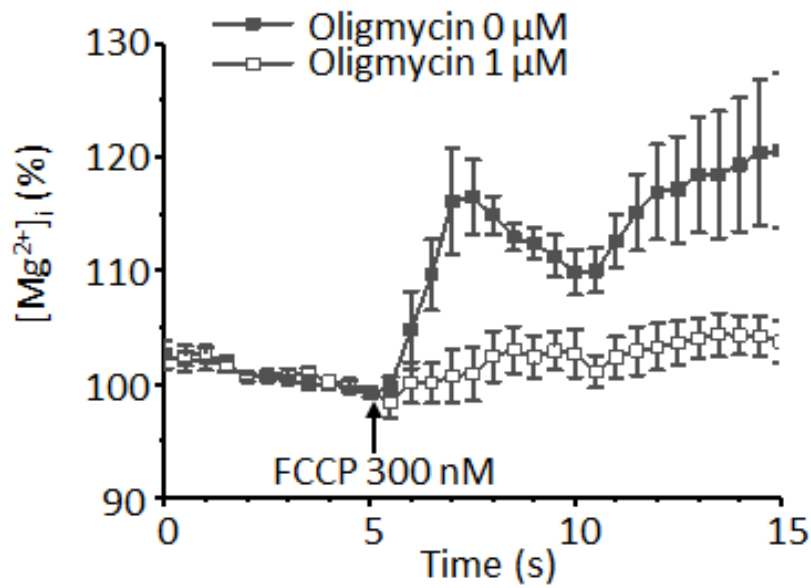

Supplement: pone.0200448.s001.pdf [file pone.0200448.s001.pdf]
